# Supplementary material for: Sulfur doped graphene as a promising metal-free electrocatalyst for oxygen reduction reaction: a DFT-D study
Source: Royal Society of Chemistry journal article supplement (doi:10.1039/c7ra00632b), 2017-01-01
Supplement: c7ra00632b1.pdf [file c7ra00632b1.pdf]

## Supplementary materials

### Sulfur doped graphene as a promising metal-free electrocatalyst for oxygen reduction reaction: A DFT-D study

The various adsorption configuration of S atom on the defect graphene.

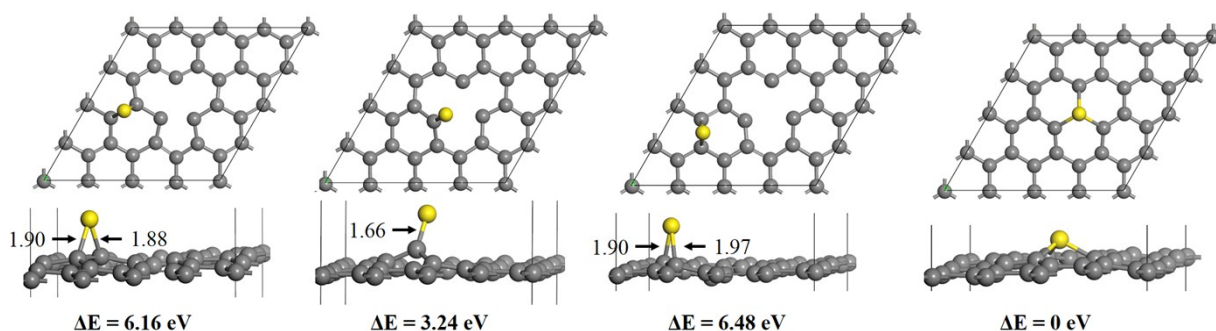

Fig. S1 Top and side views of the various adsorption configurations of S atom on the defect graphene with monovacancy. The related energies ( $\Delta E$ ) to the most stable configuration of the S doped monovacancy graphene are also presented, respectively.
